# Supplementary material for: Exploration of the Use of New Psychoactive Substances by Individuals in Treatment for Substance Misuse in the UK
Source: MDPI journal article supplement (doi:10.3390/brainsci8040058), 2018-03-30
Supplement: s1 [file s1]

Supplementary Information 1 (SI1)

**Semi-structured Interview Guide**

Opening statement:

“Thank you for agreeing to take part in this interview. Before we start I need to make sure you’re aware that everything that we discuss is confidential. I will be recording our conversation and may need to make some notes but this will be kept secure and separate from any information that could identify you. If I use any quotes from our discussion they will not identify you directly. If you tell me any information that makes me concerned that someone may be likely to suffer harm I may need to look into this further and I may need to break confidentiality to protect them. Before we start do you have any questions or concerns?”

“So we’ll make a start: if you have any questions or change your mind about speaking to me as we go along then please let me know.”

Questions:

“I would like to find out more about the use of NPS amongst the people who are currently using our service so will be asking you some questions around this theme.”

*(Explain NPS definition if needed)*

*Explore history of substance misuse (5mins):*

- “What substances (e.g. heroin, cannabis, alcohol) do you have experience of using and how/when do you use them?”
- Have you taken NPS before?”

*Explore type and pattern of use of NPS that have been taken before, (10mins):*

- “What types of NPS have you used? (e.g. cannabinoids, speedy ones)
- How did you take them? (e.g. smoke them, swallow pills, skin-popping)
- How did they fit in with your other substance misuse?
- Where did you get them from? (e.g. headshop, online, friend, relative, dealer)
- How often did you use them? (e.g. every day, a couple of times a week)

*Explore positive/negative experiences of NPS use (10mins):*

- “What did you like about them?”
- Is there anything you didn’t like about them?
- How did they affect your mental health?
- Have they affected your physical health?”

Closing statement:

“Is there anything that you would like to add or talk about that we haven’t covered?”

“Do you have any questions?”

“Thank you for your time.”

43 SI2: *Summary of Themes and Sub-themes*

44 Table SI2: Summary of number of participants who mentioned each of the themes and sub-themes.

|                             | Theme                   | Sub-theme                                    | Number of participants |
|-----------------------------|-------------------------|----------------------------------------------|------------------------|
| Type and pattern of NPS use | NPS type                | Cannabinoid ONLY                             | 1                      |
|                             |                         | Stimulating ONLY                             | 1                      |
|                             |                         | 'Other' (not otherwise specified) ONLY       | 1                      |
|                             |                         | Stimulating & Cannabinoid                    | 7                      |
|                             |                         | Stimulating, Dissociative & Hallucinogenic   | 1                      |
|                             |                         | Stimulating, Cannabinoid & Sedating          | 1                      |
|                             | Source                  | Friend ONLY                                  | 1                      |
|                             |                         | Online ONLY                                  | 1                      |
|                             |                         | Headshop ONLY                                | 6                      |
|                             |                         | Headshop & Online                            | 1                      |
|                             |                         | Headshop, Friend, Online & Other (newsagent) | 1                      |
|                             |                         | 'Street dealer' & Friend                     | 1                      |
|                             |                         | 'Street dealer' & Headshop                   | 1                      |
|                             | Frequency               | Occasional                                   | 3                      |
|                             |                         | Daily (several times)                        | 5                      |
|                             |                         | Binging                                      | 2                      |
|                             | Route of administration | Smoking ONLY                                 | 3                      |
|                             |                         | Nasal ONLY                                   | 1                      |
|                             |                         | Intra-venous injection ONLY                  | 1                      |
|                             |                         | Smoking & Intra-venous Injection             | 2                      |
|                             |                         | Nasal & Intra-venous injection               | 1                      |
|                             |                         | Oral, Nasal & Smoking                        | 2                      |
|                             |                         | Nasal, Smoking & Intra-venous Injection      | 2                      |
|                             | Concomitant use         | Cannabinoid NPS to end stimulant NPS use     | 2                      |
|                             |                         | Opiates to end stimulant NPS use             | 1                      |
|                             |                         | Benzodiazepines to end NPS use               | 1                      |
|                             |                         | Cannabinoids with tobacco                    | 4                      |
|                             |                         | Potentiating effects                         | 1                      |
|                             |                         | Displacement (prescribed opiates)            | 1                      |
|                             |                         | Displacement (illicit opiates)               | 2                      |
|                             |                         | Displacement (alcohol)                       | 1                      |
|                             | Preference              | Accessibility                                | 4                      |
|                             |                         | Avoid dealers                                | 2                      |
|                             | Harm reduction          | Changed route of administration              | 1                      |
|                             |                         | Safer injecting training                     | 1                      |
|                             |                         | Changed dose                                 | 1                      |
|                             | Affordability           | Budgeting                                    | 2                      |
|                             |                         | Cheap                                        | 1                      |
|                             |                         | Dealing                                      | 1                      |
|                             |                         | Bulk-buying                                  | 1                      |
|                             |                         | Cannabinoids with tobacco                    | 1                      |
| Positive experience         | Psychological effects   | Escapism                                     | 3                      |
|                             |                         | Relaxation                                   | 4                      |
|                             |                         | Happiness                                    | 4                      |
|                             |                         | Euphoria                                     | 1                      |

|                                              |                       |                                                    |   |
|----------------------------------------------|-----------------------|----------------------------------------------------|---|
|                                              |                       | Confidence                                         | 2 |
|                                              |                       | Alertness/Energy                                   | 5 |
|                                              |                       | Improved subjective experiences                    | 3 |
|                                              |                       | Overcome and control previous negative experiences | 1 |
|                                              | Physical effects      | Weight loss                                        | 3 |
|                                              |                       | Weight gain                                        | 1 |
|                                              |                       | Analgesia                                          | 1 |
|                                              | Preference            | Strength                                           | 3 |
|                                              |                       | Quality                                            | 3 |
|                                              |                       | Legal status                                       | 2 |
|                                              |                       | Affordability                                      | 3 |
|                                              |                       | Curiosity                                          | 2 |
|                                              |                       | Boredom                                            | 1 |
|                                              |                       | Duration                                           | 2 |
|                                              |                       | Onset of action                                    | 1 |
| Negative experiences associated with NPS use | Physical effects      | Administration site                                | 3 |
|                                              |                       | Tremor                                             | 2 |
|                                              |                       | Eczema                                             | 1 |
|                                              |                       | Sweating                                           | 2 |
|                                              |                       | Itching                                            | 1 |
|                                              |                       | Cardiac                                            | 3 |
|                                              |                       | Coughing                                           | 1 |
|                                              |                       | Seizures                                           | 1 |
|                                              | Psychological effects | Personality changes                                | 1 |
|                                              |                       | Suicidal ideation                                  | 1 |
|                                              |                       | Concentration                                      | 1 |
|                                              |                       | Dependency/Addiction                               | 4 |
|                                              |                       | Cravings                                           | 1 |
|                                              |                       | Impaired activity of daily living                  | 3 |
|                                              |                       | Self-neglect                                       | 1 |
|                                              |                       | Loss of control                                    | 2 |
|                                              |                       | Confusion                                          | 1 |
|                                              |                       | Impaired memory                                    | 1 |
|                                              |                       | Panic attacks                                      | 1 |
|                                              | Preference            | Affordability                                      | 1 |
|                                              |                       | Strength                                           | 5 |
|                                              |                       | Quality                                            | 3 |
|                                              | Legal                 | Police involvement                                 | 1 |
|                                              |                       | Detained (Mental Health Act)                       | 1 |
